# Supplementary material for: Using the Exploratory Sequential Mixed Methods Design to Investigate Dental Patients’ Perceptions and Needs Concerning Oral Cancer Information, Examination, Prevention and Behavior
Source: MDPI journal article supplement (doi:10.3390/ijerph18147562), 2021-07-16
Supplement: s1 [file s1]

**Coding Process Table**

| Responses                                                                                      |                                                                                    |                                             |                                  |                                      |                                                                                           |                                                                                      |                                                                         |                                                                      |                                                                      |
|------------------------------------------------------------------------------------------------|------------------------------------------------------------------------------------|---------------------------------------------|----------------------------------|--------------------------------------|-------------------------------------------------------------------------------------------|--------------------------------------------------------------------------------------|-------------------------------------------------------------------------|----------------------------------------------------------------------|----------------------------------------------------------------------|
| "I have no idea; a tumor may be a tumor" X4                                                    | "I don't know" X17                                                                 | "I have no idea" X12                        | "Regular check-ups" X7           | "Not available in Jazan area" X24    | "it is useful, it helps early detection of the cancer" X24                                | "I have no perception of that" X11                                                   | "I don't think my dentist ever examined me" X4                          | "No, he has not" X36                                                 | "I do regular self-check-ups, it is a good experience"               |
| "It is a tumor in the mouth, or the oral cavity" X23                                           | "The area is not endemic with Oral cancer, because I don't have any complaints" X2 | "Smoking, Ghat and Shammah" X17             | "I am not well aware of them" X9 | "It is available but hard to access" | "No, I don't think routine clinical examination will be useful"                           | "it would be helpful if dentists would educate their patients about oral cancer" X29 | "No, because I didn't ask him, and maybe because I don't have symptoms" | "My dentist educated me about oral cancer and it was informative" X4 | "I don't do self-examination because I don't know how to do so". X39 |
| "Ulcers or wounds inside the mouth of a person who smokes or uses Ghat that turns into cancer" | "I never heard that the area is endemic" X3                                        | "Smoking or any facilitator of bacteria" X2 | "by maintaining oral hygiene" X9 | "It is available in the area" X7     | "it is useful, it helps early detection of the cancer, but I would be scared to be on the |                                                                                      | "No, because it is not widespread"                                      |                                                                      |                                                                      |

|                                                                                |                                                          |                                                       |                                                       |                       |  |  |                                                                |  |
|--------------------------------------------------------------------------------|----------------------------------------------------------|-------------------------------------------------------|-------------------------------------------------------|-----------------------|--|--|----------------------------------------------------------------|--|
|                                                                                |                                                          |                                                       |                                                       | receiving<br>end" X15 |  |  |                                                                |  |
| "Ulcers or<br>stains in the<br>mouth that<br>are<br>cancerous"<br>X2           | "Yes, the area<br>is endemic<br>with oral<br>cancer" X17 | "Smoking and<br>carelessness"<br>X2                   | "No<br>smoking<br>and good<br>oral<br>hygiene"<br>X10 | "I don't<br>know" X8  |  |  | "No, he has<br>not<br>examined<br>me" X31                      |  |
| "It is an<br>infection due<br>to intake of<br>expired food"                    | "No, the area<br>is not<br>endemic"                      | "Genetic<br>mutations<br>give rise to<br>oral cancer" | "I have no<br>idea" X2                                |                       |  |  | "Yes, my<br>dentist did<br>an oral<br>examination<br>on me" X3 |  |
| "I have no<br>idea what<br>this disease<br>is" X6                              |                                                          | "Environment"                                         |                                                       |                       |  |  |                                                                |  |
| "it is a fungal<br>infection that<br>was<br>neglected<br>becomes<br>cancer" X2 |                                                          | "Alcohol and<br>smoking" X2                           | "Sunlight<br>prevents<br>against oral<br>cancer"      |                       |  |  |                                                                |  |
| "It is due to<br>an infection"                                                 |                                                          | "poor oral<br>hygiene" X2                             |                                                       |                       |  |  |                                                                |  |

|                                                                                                                                                                                                                                                                                          |              |                                   |            |            |                      |                    |                      |                    |                  |
|------------------------------------------------------------------------------------------------------------------------------------------------------------------------------------------------------------------------------------------------------------------------------------------|--------------|-----------------------------------|------------|------------|----------------------|--------------------|----------------------|--------------------|------------------|
|                                                                                                                                                                                                                                                                                          |              | "Other cancers cause oral cancer" |            |            |                      |                    |                      |                    |                  |
| Initial Codes                                                                                                                                                                                                                                                                            |              |                                   |            |            |                      |                    |                      |                    |                  |
| Etiology                                                                                                                                                                                                                                                                                 | Epidemiology | Risk Factors                      | Prevention | Detection  | Clinical examination | Preventive methods | Clinical examination | Clinical Education | Self-examination |
| Focus Codes                                                                                                                                                                                                                                                                              |              |                                   |            |            |                      |                    |                      |                    |                  |
| Knowledge                                                                                                                                                                                                                                                                                |              |                                   |            | Perception |                      |                    | Practice             |                    |                  |
| Theoretical Codes                                                                                                                                                                                                                                                                        |              |                                   |            |            |                      |                    |                      |                    |                  |
| 1) JDS-clinic patients have low awareness of oral cancer and its risk factors<br>2) The practice of oral cancer examination and patient education on its risk factors is limited<br>3) JDS-clinic patients feel that there is a need for more attention towards oral cancer examinations |              |                                   |            |            |                      |                    |                      |                    |                  |

## **Appendix A**

### **JDS Patients Interview Guide**

#### **Questions:**

- 1) What do you know about oral cancer?
- 2) In your opinion, how could individual develop oral cancer?
  - What do you think are the risk factors of oral cancer?
  - How it can be prevented?
- 3) Do you think that the cancer of oral cavity is an issue in Jazan?
  - If yes how /why? How serious is the problem?
  - If no: why?
- 4) Do you think you or any one member of your family/community is at risk of oral cancer?
  - If yes how /why?
  - If no: why?
- 5) What do you think about oral cancer examination/ screening?
  - In your opinion, do you think it is useful?
    - If yes how /why?
    - If no: why?
- 6) What do you feel toward performing an oral cancer examination/ screening for you in the dental clinic?

- 7) Have you had an oral cancer examination done to you in dental or other clinic?
- If yes: what were your experiences with this?
  - If no: why think dentists didn't do so? Do you think you can do anything about it?
- 8) Do you think that oral cancer examination/ screening is accessible in Jazan?
- If no: why? Do you think you can do anything about it?
- 9) Do you think that oral cancer treatment is possible in Jazan?
- If no: why? Do you think you can do anything about it?
- 10) Have you had any education on oral cancer and their risks while in dental or other clinic?
- If yes: what were your experiences with this?
  - If no: why think dentists didn't do so?
- 11) What do you feel toward educating patients of oral cancer during dental clinic examination/ screening?
- 12) In your opinion, do you think that there are any/enough oral cancer education materials in Jazan dental school clinics?
- If yes: do you think it is followed? If not: why?
  - If no: why?
- 13) Do you currently engage in oral cancer self-examination/ screening?
- If yes: what were your experiences with this?
  - If no: why?
- 14) Do you have any thing that you would like to add?
